# Supplementary material
Source: PubMed Central journal article supplement (PMC5373872)

## Supplemental figures and Figure legends

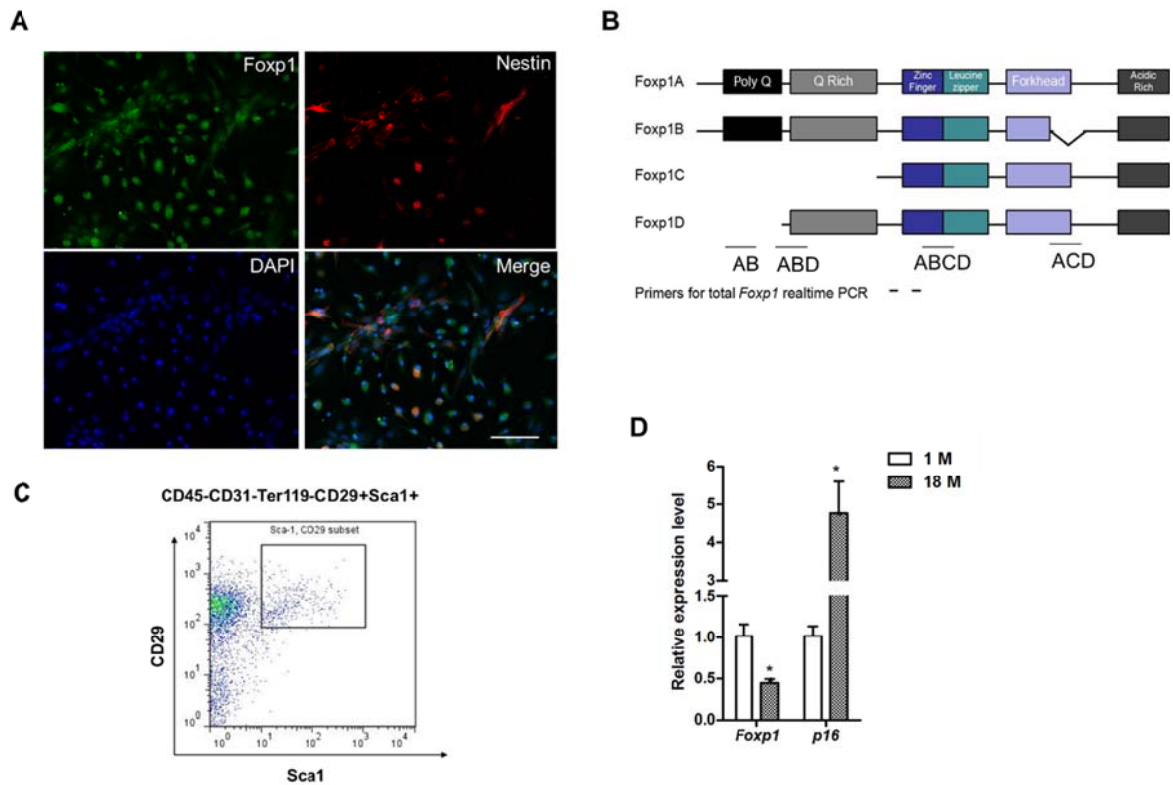

### Supplemental Figure S1. Expression of Foxp1 during MSC differentiation.

(A) Co-localization of Foxp1 and Nestin in cultures of MSCs isolated from 1-month-old bone marrow (BM). (B) Locations of oligonucleotide probes used for qPCR detection of Foxp1A, B, C, and D isoforms. (C) Representative dot plot of MSC FACS employing expression (+) or absence (-) of standard markers: CD45<sup>-</sup> CD31<sup>-</sup> Ter119<sup>-</sup> CD29<sup>+</sup> Sca1<sup>+</sup>. (D) qPCR detection of Foxp1 and p16 in MSCs sorted by FACS in BM from 1 and 18- months-old donors.

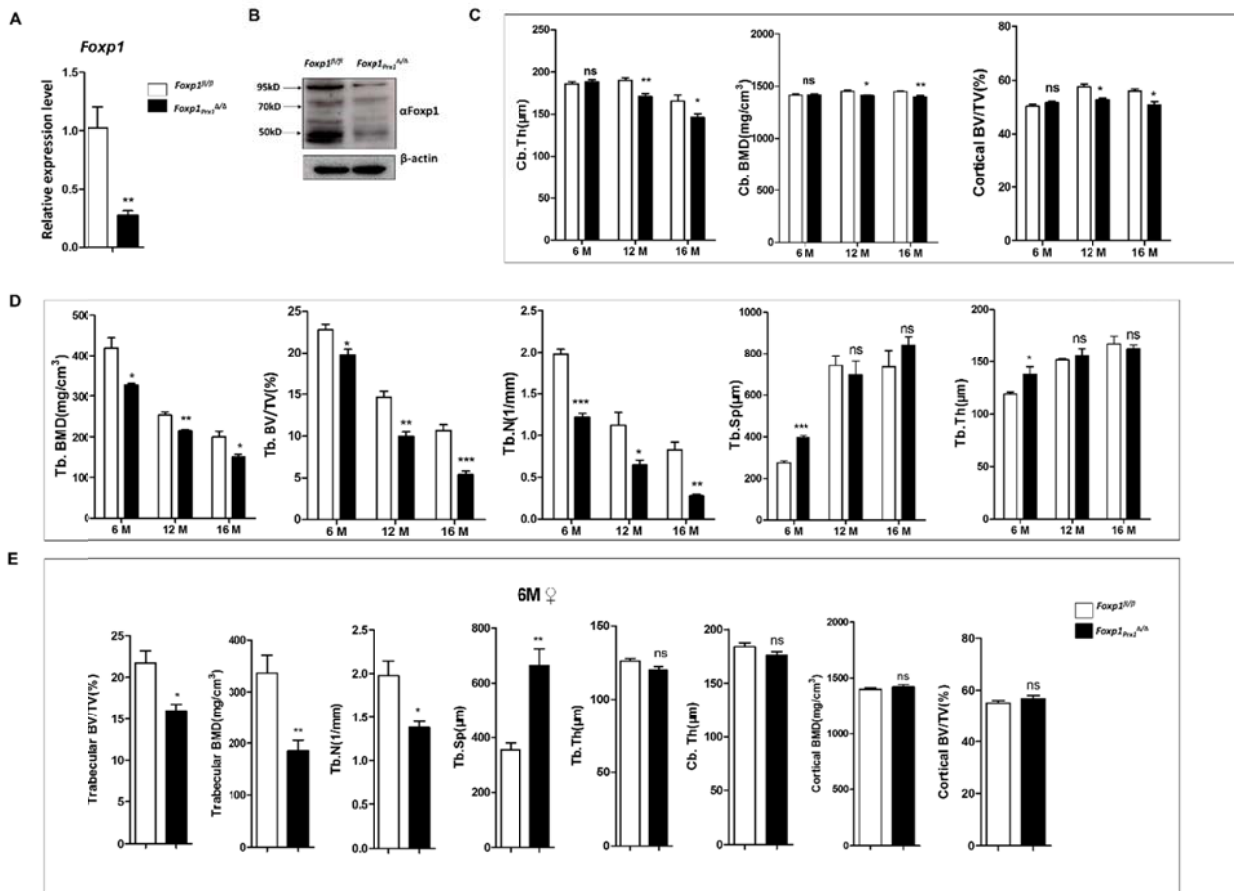

### Supplemental Figure S2. Bone properties of *Foxp1<sup>Prx1</sup>Δ/Δ* female mutants.

(A, B) Assessment of *Foxp1* expression in BM MSCs from *Foxp1<sup>Prx1</sup>Δ/Δ* mutants by qPCR and western blotting. \*\*,  $P < 0.01$ ;  $n = 4$ . (C, D)  $\mu$ CT analyses detects progressive loss of volume, number, and BMD of trabecular bones as well as volume, thickness, and BMD of cortical bones in *Foxp1<sup>Prx1</sup>Δ/Δ* mutants between 6 and 16 months.  $n = 4$ . (E) The volume, number and BMD of trabecular bones were decreased, whereas trabecular separation was increased in mutants as compared to controls. The thickness of trabecular bones and parameters of cortical bones were unaltered. Abbreviations: BV/TV, bone volume/tissue volume; BMD, bone mineral density; Tb.N., trabecular bone number; Tb.Sp., trabecular bone separation; Tb.Th., trabecular bone thickness; Cb.Th., cortical bone thickness. \*indicates  $P < 0.05$ ; \*\*,  $P < 0.01$ ; \*\*\*,  $P < 0.001$ ;  $n = 4$ .

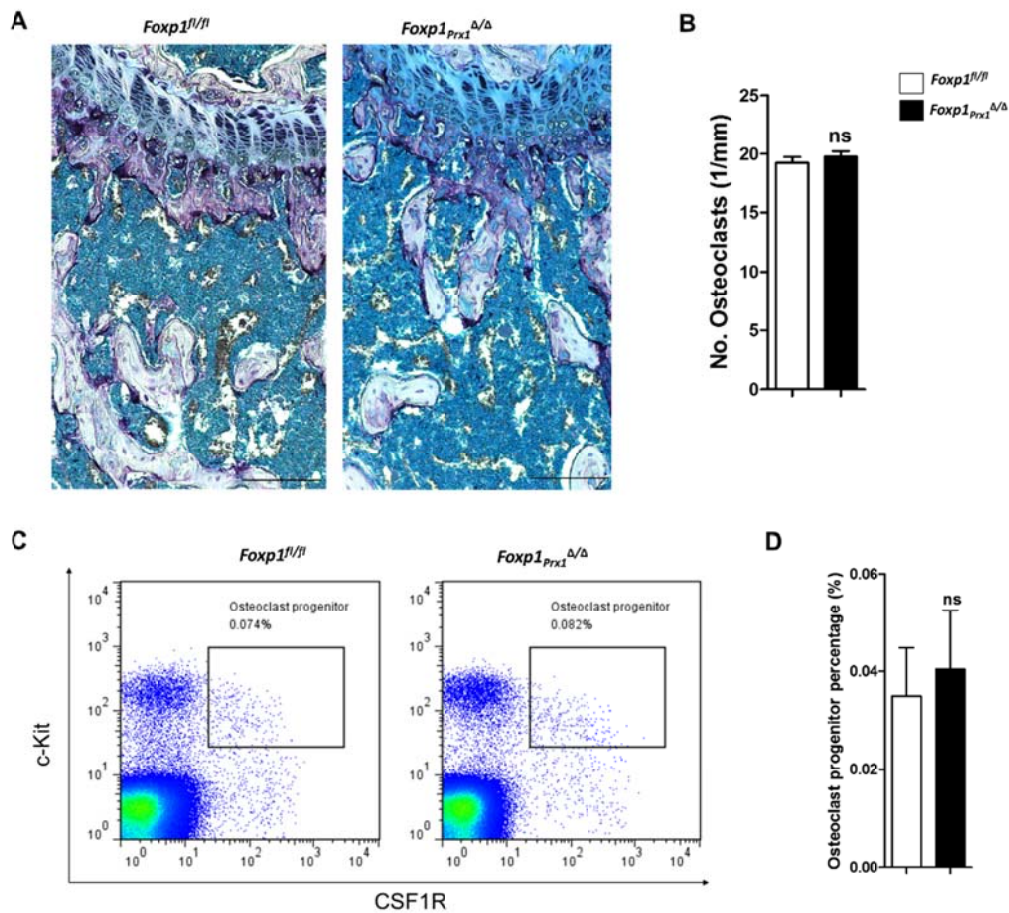

**Supplemental Figure S3. TRAP staining for osteoclasts in *Foxp1<sup>Prx1</sup><sup>Δ/Δ</sup>* mice.**

(A) TRAP staining for trabecular bones of *Foxp1* mutant and control mice at 3 months of age. (B) Quantification of osteoclast numbers in (A). (C) Dot plot of FACS analysis of osteoclast progenitor cells in BM *Foxp1* mutant and control mice at 3 months of age as defined by FACS expression (+) or absence (-) of standard markers:  $CD3^{-}B220^{-}CD11b^{-}CSF1R^{+}cKit^{+}$ . (D) Quantification of osteoclast progenitor cell numbers in (C); ns, nonsignificant; n=3.

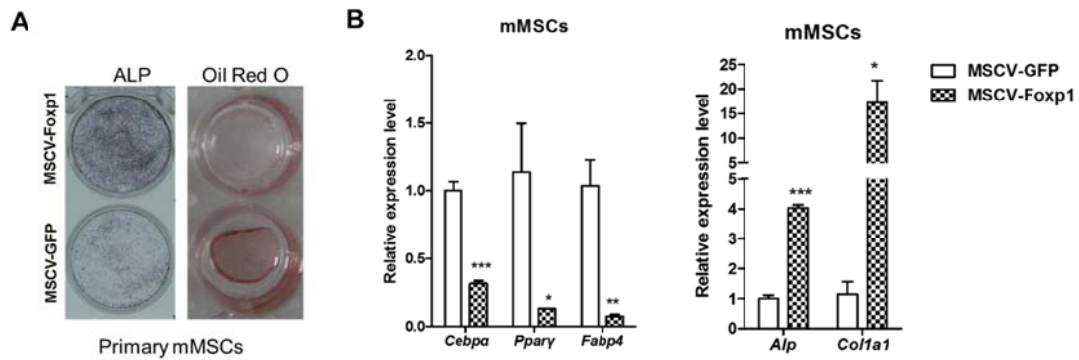

**Supplemental Figure S4. Foxp1 regulates the differentiation of adipocytes and osteoblasts in MSCs.**

(A) *Foxp1* was overexpressed in murine MSCs by insertion into retrovirus (pMSCV-Foxp1) followed by stable-transfection of MSCs and then selected and cultured in differentiation medium. Cell differentiation was assessed 6 days after adipogenic induction by oil red O staining or 14 days after osteogenic induction by ALP staining. (B) The expression of adipogenic markers (*CEBP $\alpha$* , *PPAR $\gamma$*  and *Fabp4*) analyzed by RT-qPCR 6 days following adipogenic induction of Foxp1-expressing MSCs cells. (C) Expression of bone markers (*Alp* and *Col1a1*) as assessed by RT-qPCR following 14 days of osteogenic culture. \*,  $P < 0.05$ ; \*\*\*,  $P < 0.001$ ;  $n = 3$ .

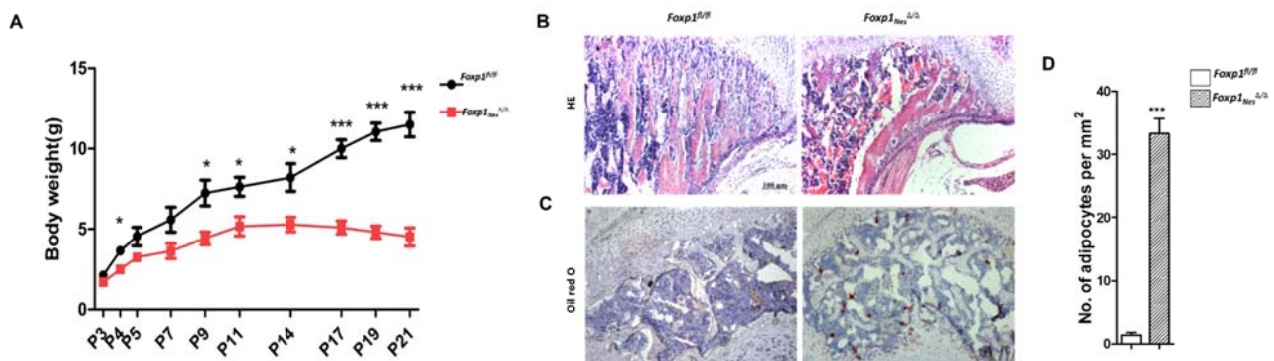

**Supplemental Figure S5. Histological analysis of the bone marrow in *Foxp1<sup>Nes $\Delta/\Delta$</sup>*  mice.**

(A) Growth curve of *Foxp1<sub>Nes</sub><sup>Δ/Δ</sup>* mice from measured at days after passage (P) from P3 to P21. (B) H&E staining of tibias from *Foxp1<sup>fl/fl</sup>* and *Foxp1<sub>Nes</sub><sup>Δ/Δ</sup>* mice at P21. Representative images were taken from the primary ossification region below the growth plates. (C) Oil red O staining of the tibias of (B) at P21. Representative images were taken from the secondary ossification proximal to the knee joint. (D) Quantification of the adipose droplets in (C); \*\*\*,  $P < 0.001$ ; n=5.

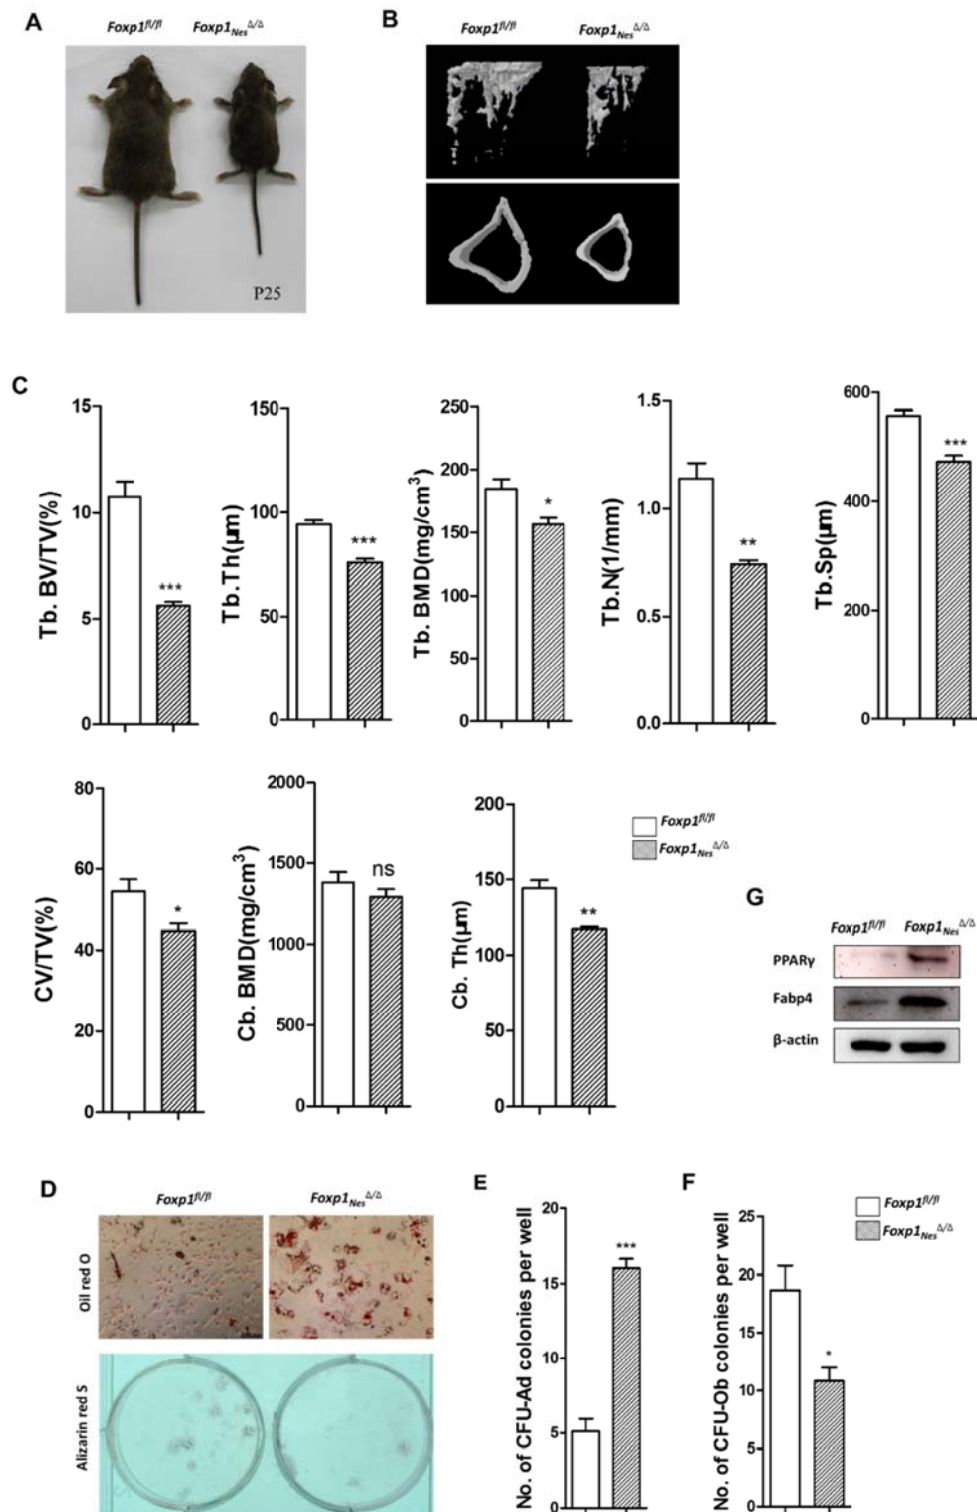

**Supplemental Figure S6. The altered osteogenic and adipogenic potency of MSCs in *Foxp1<sup>NesΔ/Δ</sup>* mice.**

(A) Representative images of *Foxp1<sup>NesΔ/Δ</sup>* and *Foxp1<sup>fl/fl</sup>* mice at P25. (B)

Representative images of  $\mu$ CT analysis for trabecular and cortical bones of tibias in  $Foxp1_{Nes}^{\Delta\Delta}$  at P21. (C) Quantification of bone properties indicating that trabecular BV/TV, BMD, Tb.N, Tb.Th and Tb.Sp were decreased, whereas BS/BV was relatively increased. Similarly, Cb.Th and CV/TV of the cortical bones were also decreased but cortical BMD was not significantly altered. \*,  $P<0.05$ ; \*\*,  $P<0.01$ ; \*\*\*,  $P<0.001$ ; n=5. (D) The adipogenic potency of BM mesenchymal progenitors was assessed 14 days after adipogenic induction by oil red O staining (upper panel). Osteogenic differentiation of mesenchymal progenitors was assessed by Alizarin red staining at 21 days of differentiation induction (lower panel). (E, F) Quantification of adipocyte colonies (CFU-Ad) and osteoblast colonies (CFU-Ob) in (D). \*,  $P<0.05$ ; \*\*\*,  $P<0.001$ ; n=4. (G) Western blot identification of PPAR $\gamma$  and Fabp4 expression in BM mesenchymal progenitors from  $Foxp1_{Nes}^{\Delta\Delta}$  and  $Foxp1^{fl/fl}$  mice at P21.

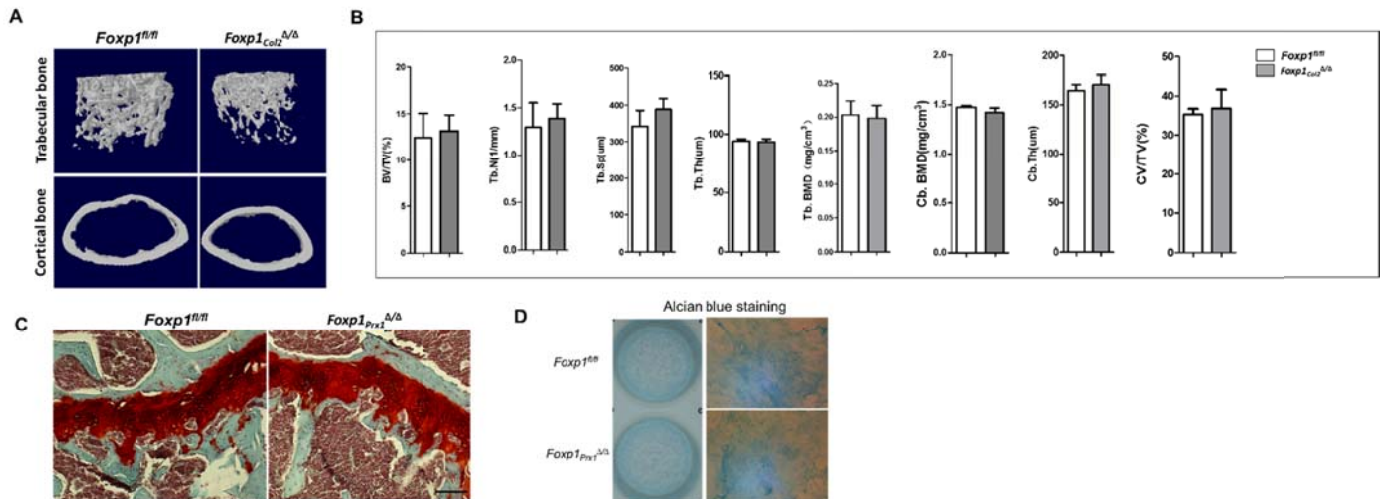

### Supplemental Figure S7. Bone phenotypes in the $Foxp1_{Col2}^{\Delta\Delta}$ mice.

(A) Representative images of trabecular and cortical bones from tibia of  $Foxp1_{Col2}^{\Delta\Delta}$  mutant and  $Foxp1^{fl/fl}$  control 3 months old mice by  $\mu$ CT analyses. (B)  $\mu$ CT analyses detect no changes in bone properties in  $Foxp1_{Col2}^{\Delta\Delta}$  mutant mice. Abbreviations: BV/TV, bone volume/tissue volume; BMD, bone mineral density; Tb. N., trabecular bone number; Tb. Sp., trabecular bone separation; Tb. Th., trabecular bone thickness;

Cb. Th., cortical bone thickness. \*,  $P < 0.05$ ; \*\*,  $P < 0.01$ ; \*\*\*,  $P < 0.001$ ;  $n = 5$ . (C) Safranin O staining of the growth plate of *Foxp1<sup>Prx1</sup> $\Delta/\Delta$*  mutant and *Foxp1<sup>fl/fl</sup>* controls at 8 months of age. (D) Alcian blue staining for the chondrogenic differentiation of mesenchymal progenitor cells after 14 days induction.

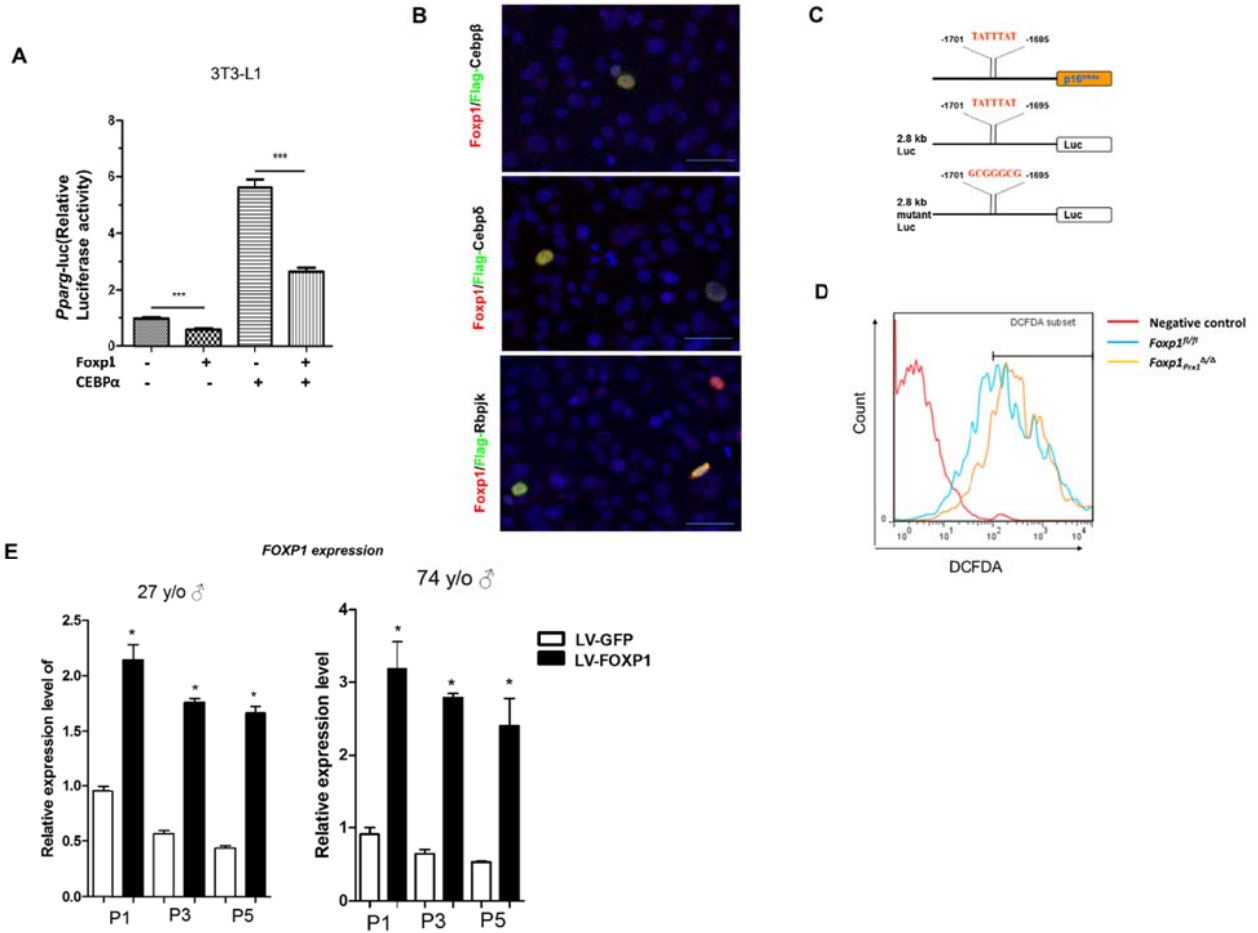

**Supplemental Figure S8. Foxp1 represses the transactivation of *PPARγ*-Luc by CEBPα.**

(A) Foxp1 repressed the transactivation of *PPARγ*-Luc by CEBPα. \*,  $P < 0.05$ ; \*\*,  $P < 0.01$ ; \*\*\*,  $P < 0.001$ ;  $n = 3$ . (B) Co-localization of Foxp1 with CEBPβ, CEBPδ or RBPjk in the nuclei of C3H10T1/2 cells transfected with Foxp1 and CEBPβ/δ-Flag or RBPjk-Flag expression vectors. Green, anti-Flag; red, anti-Foxp1; blue, DAPI



staining to identify nuclei. Bar, 50  $\mu$ m. (C) Schematic diagram showing that the mutation induced within the p16 promoter, which was employed in Figure 6C. (D) Representative histograms of DCFDA mean fluorescence intensities in mesenchymal progenitors of the second passages of cultures. (E) Expression of *FOXP1* in P1, P3 and P5 passages of 27- and 74-year-old hMPCs following Foxp1 lentiviral-mediated overexpression.

## Oligos sequence for PCR

Primers for realtime PCR

| Species   | Name                 | Sequence                  |
|-----------|----------------------|---------------------------|
| Mouse     | $\beta$ -actin-F     | AGAGGGGAAATCGTGCGTGACA    |
|           | $\beta$ -actin-R     | CACTGTGTTGGCATAGAGGTC     |
|           | Foxp1-F              | TCTCGTCCTCGGCACCTT        |
|           | Foxp1-R              | GTCACAAACCGCCTCACA        |
|           | Nestin-F             | CACACCTCAAGATGTCCC        |
|           | Nestin-R             | GAAAGCCAAGAGAAGCCT        |
|           | Cebp $\alpha$ -F     | TGGACAAGAACAGCAACGAG      |
|           | Cebp $\alpha$ -R     | TCACTGGTCAACTCCAGCAC      |
|           | PPAR $\gamma$ -F     | GGAAAGACAACGGACAAATCAC    |
|           | PPAR $\gamma$ -R     | TACGGATCGAAACTGGCAC       |
|           | Fabp4-F              | GATGAAATCACCGCAGACGACA    |
|           | Fabp4-R              | ATTGTGGTCGACTTTCCATCCC    |
|           | p21-F                | GAACATCTCAGGGCCGAAAAC     |
|           | p21-R                | CTGCGCTTGGAGTGATAGAA      |
|           | p27-F                | ACTAACCCGGGACTTGGAGA      |
|           | P27-R                | GAAATTCCACTTGCCTGAC       |
|           | p53-F                | GTCACAGCACATGACGGAGG      |
|           | p53-R                | TCTTCCAGATACTCGGGATAC     |
|           | p16-F                | CTAGAGAGGATCTTGAGAAGAGGGC |
|           | p16-R                | TAGTTGAGCAGAAGAGCTGCTACGT |
|           | Bmi-F                | CTACACGCTAATGGACATTGCCT   |
|           | Bmi-R                | CCATCCCTCTGGTGACTCATCTT   |
|           | Hey1-F               | CACTGCAGGAGGGAAAGGTTAT    |
|           | Hey1-R               | CCCCAAACTCCGATAGTCCAT     |
|           | HeyL-F               | GAAGCGCAGAGGGATCATAGA     |
|           | HeyL-R               | CCAATCGTCGCAATTCAGAA      |
| Jagged1-F | CTTCAATCTCAAGGCCAGCC |                           |
| Jagged1-R | CAGGCGAAACTGAAAGGCAG |                           |

|       |                   |                         |
|-------|-------------------|-------------------------|
|       | Alp-F             | GCCTGGATCTCATCAGTATTTGG |
|       | Alp-R             | G TTCAGTGCGGTTCCAGACAT  |
|       | Coll $\alpha$ 1-F | CCGGAAGAATACGTATCACC    |
|       | Coll $\alpha$ 1-R | ACCAGGAGGACCAGGAAGTC    |
|       | Runx2-F           | CCGGGAATGATGAGAACTA     |
|       | Runx2-R           | ACCGTCCACTGTCAC TTT     |
|       | Osterix-F         | CTCTCTGCTTGAGGAAGAAG    |
|       | Osterix-R         | GTCCATTGGTGCTTGAGAAG    |
|       |                   |                         |
| Human | ALP-F             | AACATCAGGGACATTGACGTG   |
|       | ALP-R             | GTATCTCGGTTTGAAGCTCTTCC |
|       | COL1A1-F          | GTGCGATGACGTGATCTGTGA   |
|       | COL1A1-R          | CGGTGGTTTCTTGGTCGGT     |
|       | HEY1-F            | ATCTGCTAAGCTAGAAAAAGCCG |
|       | HEY1-R            | GTGCGCGTCAAAGTAACCT     |
|       | HEYL-F            | GGAAGAAACGCAGAGGGATCA   |
|       | HEYL-R            | CAAGCGTCGCAATTCAGAAAG   |
|       | ACTIN-F           | CCAGCACAATGAAGATCAAGAT  |
|       | ACTIN-R           | AGAAAGGGTGTAACGCAACTAA  |
|       | FOXP1-F           | GGGCAGTATGGACAGTGGATGA  |
|       | FOXP1-R           | TTGAGAGGTGTGCAGTAGGCGTG |
|       |                   |                         |

| Primers for ChIP-PCR |                         |
|----------------------|-------------------------|
| Name                 | Sequence                |
| Pparg-ChIP-F         | CCCATTGAGCTATTGCTTC     |
| Pparg-ChIP-R         | TCAGTGACTTGTGGACTTT     |
| p16-ChIP-F           | TACACAGTTATGAGTTAGGGCAA |
| p16-ChIP-R           | CTTCTTGAGGTCTGTAAGGAAAA |



Figure 2B

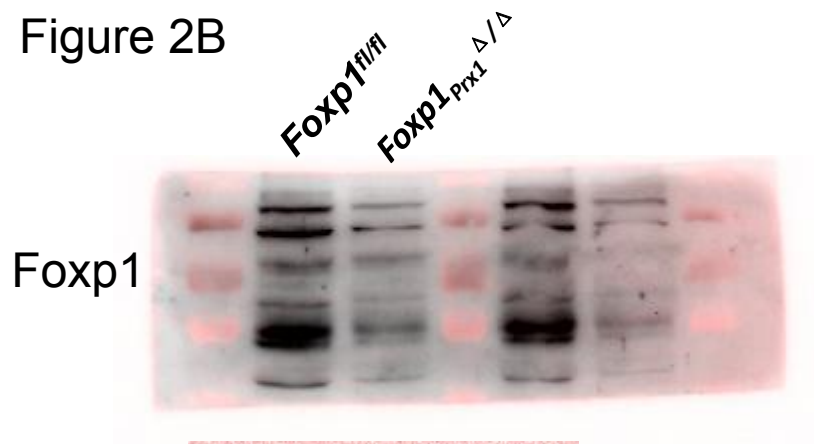

$\beta$ -actin

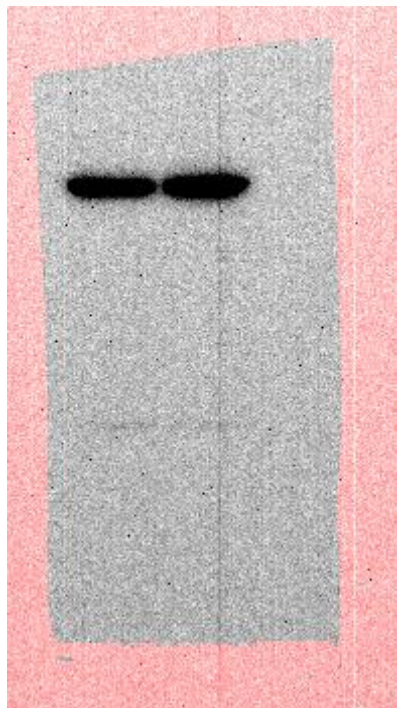

Figure 4F

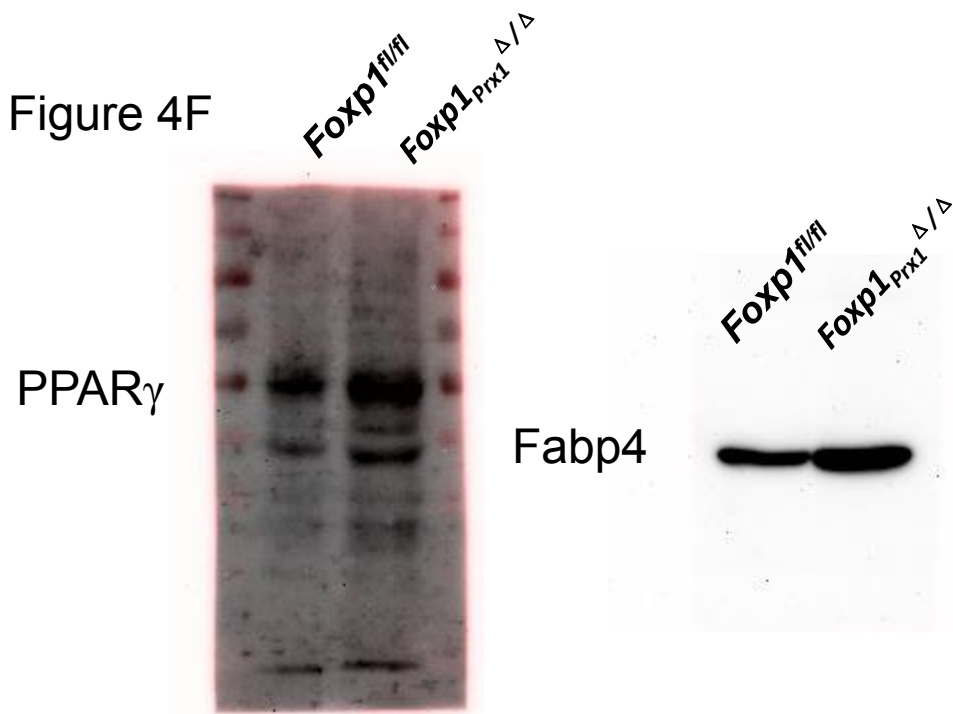

PPAR $\gamma$

Fabp4

$\beta$ -actin

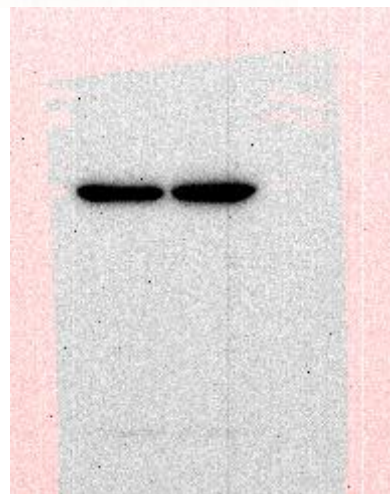

Figure 4A

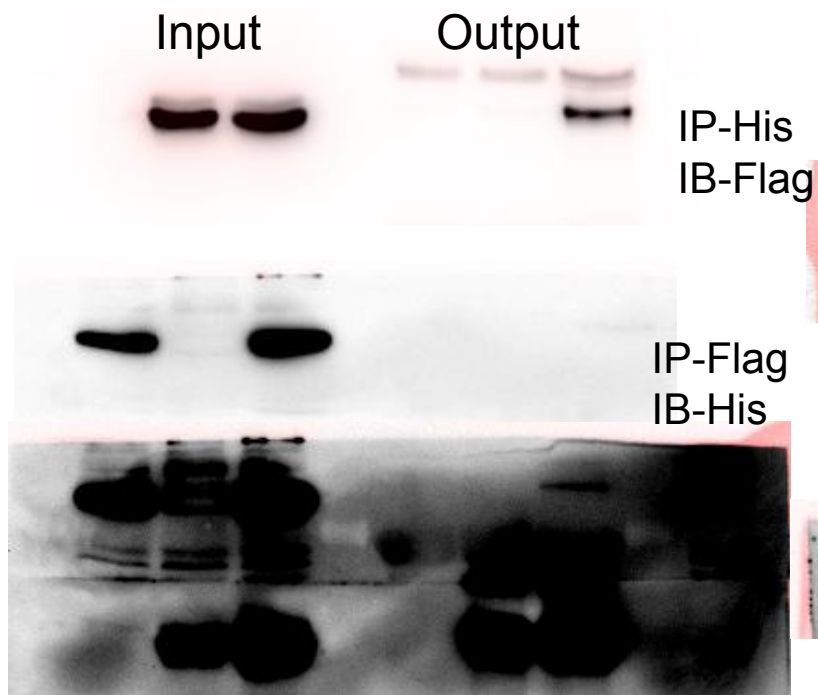

Figure 4B

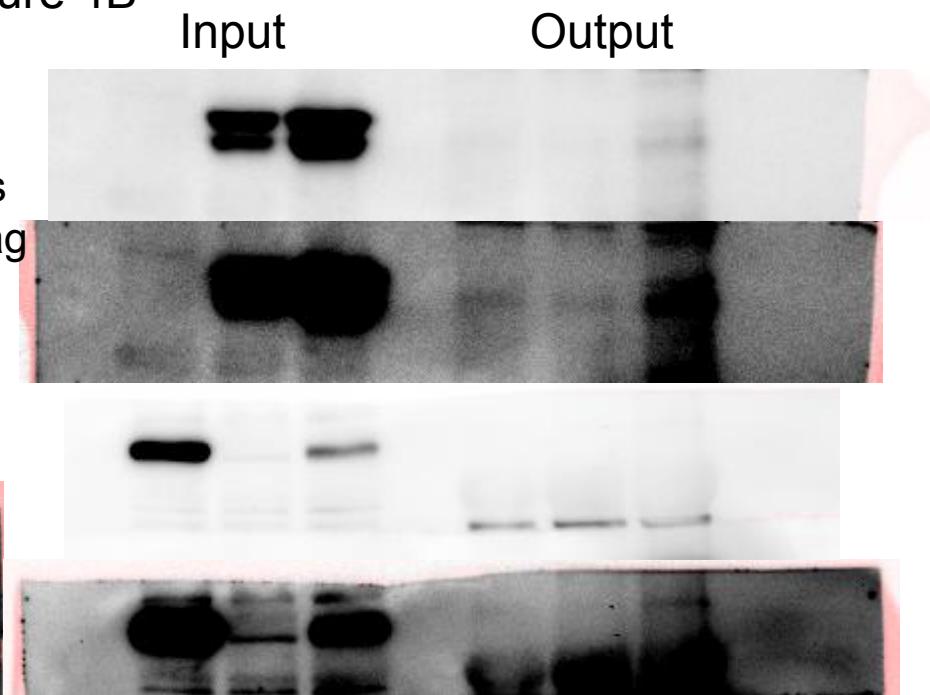

|            |   |   |   |   |   |   |
|------------|---|---|---|---|---|---|
| Cebpβ-Flag | - | + | + | - | + | + |
| Foxp1-His  | + | - | + | + | - | + |

|            |   |   |   |   |   |   |
|------------|---|---|---|---|---|---|
| Cebpδ-Flag | - | + | + | - | + | + |
| Foxp1-His  | + | - | + | + | - | + |

Figure 4C

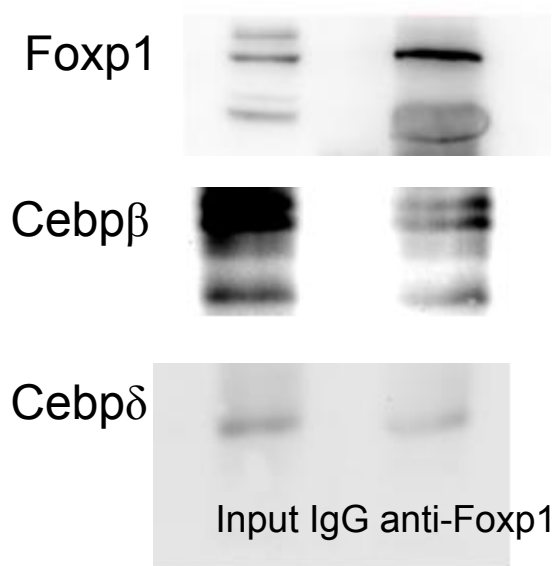

Figure 4K

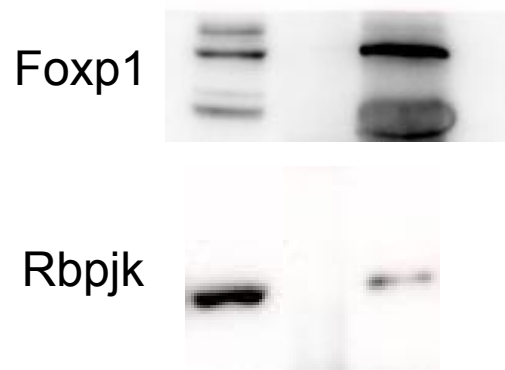

Figure 4J

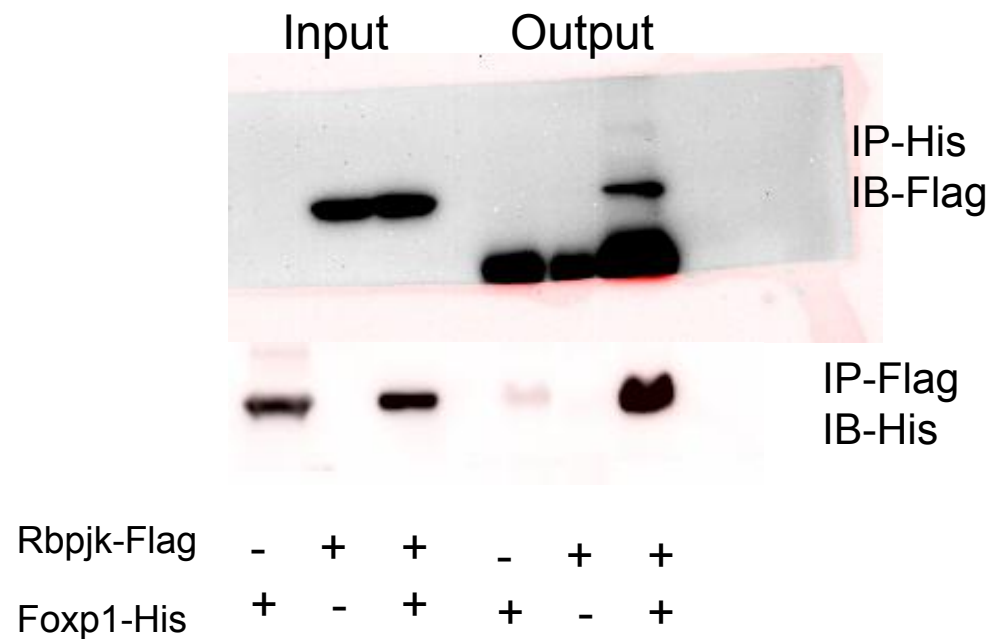

Figure 5G

*Foxp1<sup>fl/fl</sup>*  
*Foxp1<sup>Ptx1</sup> Δ/Δ*

Foxp1

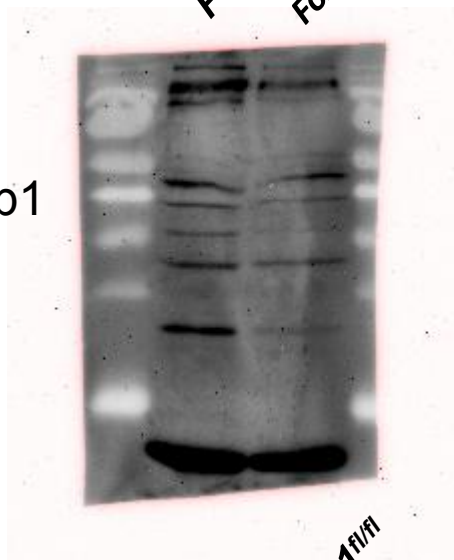

*Foxp1<sup>fl/fl</sup>*  
*Foxp1<sup>Ptx1</sup> Δ/Δ*

p16

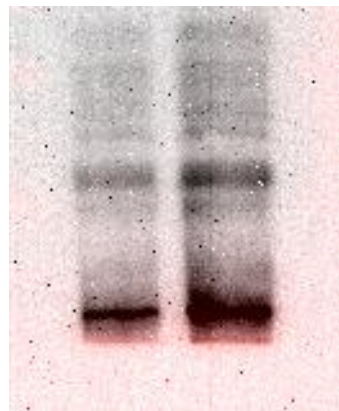

$\beta$ -actin

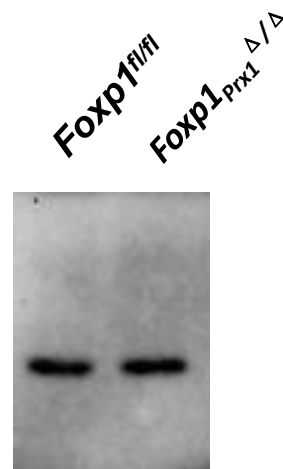

*Foxp1<sup>fl/fl</sup>*  
*Foxp1<sup>Ptx1</sup> Δ/Δ*

H3K9me3

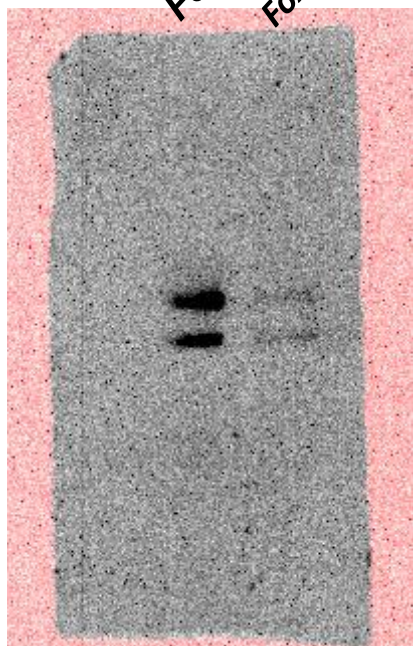

*Foxp1<sup>fl/fl</sup>*  
*Foxp1<sup>Ptx1</sup> Δ/Δ*

LAP2 $\beta$

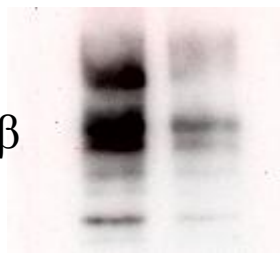

$\beta$ -actin

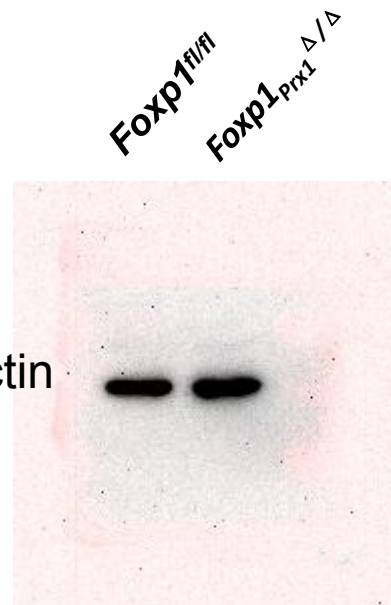

Figure 7H

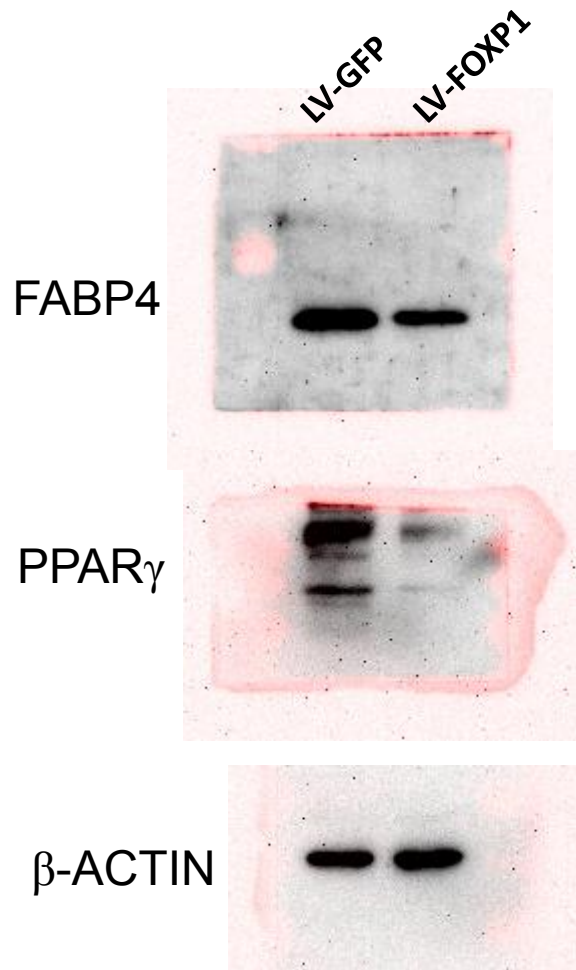



Figure S6G

*Foxp1<sup>fl/fl</sup>*  
*Foxp1<sup>nes</sup> Δ/Δ*

PPAR $\gamma$

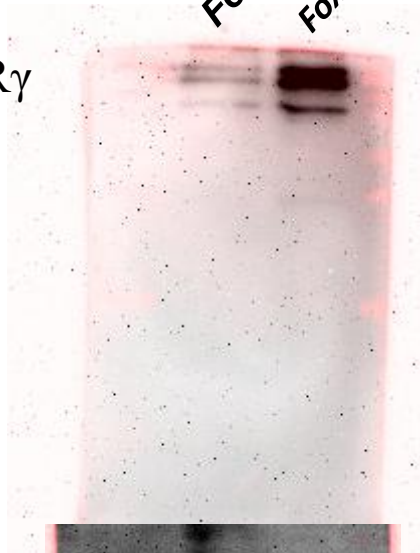

Fabp4

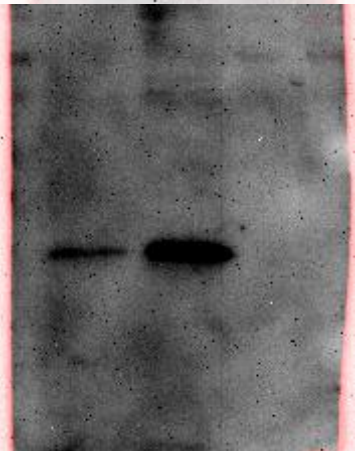

$\beta$ -actin

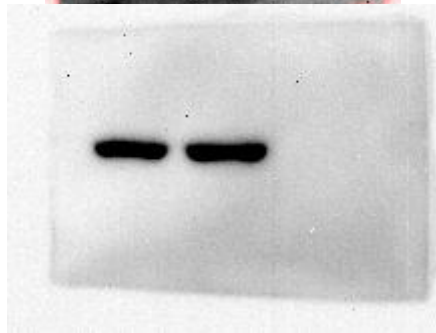

Supplement: jci-127-89511-s001.pdf [file jci-127-89511-s001.pdf]
